# Supplementary material for: Comorbidity patterns and socioeconomic inequalities in children under 15 with medical complexity: a population-based study
Source: Springer Nature journal article supplement (doi:10.1186/s12887-020-02253-z), 2020-07-30
Supplement: MOESM2 [file 18233018]

**Additional file 2. List of the Clinical Classifications Software (CCS) for ICD-9-MC included in each disease category (covering the 90.6% of all the diseases events).**

| Diseases categories          | CCS                                | CCS Description                                       |
|------------------------------|------------------------------------|-------------------------------------------------------|
| Septicemia (except in labor) | 2                                  | Septicemia (except in labor)                          |
| Infections                   | 3                                  | Bacterial infection; unspecified site                 |
|                              | 4                                  | Mycoses                                               |
|                              | 8                                  | Other infections; including parasitic                 |
|                              | 7                                  | Viral infection                                       |
|                              | 123                                | Influenza                                             |
| Hepatitis                    | 6                                  | Hepatitis                                             |
| Malignant cancer             | 11                                 | Cancer of head and neck                               |
|                              | 12                                 | Cancer of esophagus                                   |
|                              | 13                                 | Cancer of stomach                                     |
|                              | 14                                 | Cancer of colon                                       |
|                              | 15                                 | Cancer of rectum and anus                             |
|                              | 16                                 | Cancer of liver and intrahepatic bile duct            |
|                              | 17                                 | Cancer of pancreas                                    |
|                              | 18                                 | Cancer of other GI organs; peritoneum                 |
|                              | 19                                 | Cancer of bronchus; lung                              |
|                              | 20                                 | Cancer; other respiratory and intrathoracic           |
|                              | 21                                 | Cancer of bone and connective tissue                  |
|                              | 22                                 | Melanomas of skin                                     |
|                              | 23                                 | Other non-epithelial cancer of skin                   |
|                              | 24                                 | Cancer of breast                                      |
|                              | 25                                 | Cancer of uterus                                      |
|                              | 26                                 | Cancer of cervix                                      |
|                              | 27                                 | Cancer of ovary                                       |
|                              | 28                                 | Cancer of other female genital organs                 |
|                              | 29                                 | Cancer of prostate                                    |
|                              | 30                                 | Cancer of testis                                      |
|                              | 31                                 | Cancer of other male genital organs                   |
|                              | 32                                 | Cancer of bladder                                     |
|                              | 33                                 | Cancer of kidney and renal pelvis                     |
|                              | 34                                 | Cancer of other urinary organs                        |
|                              | 36                                 | Cancer of thyroid                                     |
|                              | 37                                 | Hodgkin`s disease                                     |
|                              | 40                                 | Multiple myeloma                                      |
|                              | 41                                 | Cancer; other and unspecified primary                 |
|                              | 42                                 | Secondary malignancies                                |
|                              | 43                                 | Malignant neoplasm without specification of site      |
|                              | 44                                 | Neoplasms of unspecified nature or uncertain behavior |
|                              | 45                                 | Maintenance chemotherapy; radiotherapy                |
|                              | Cancer of brain and nervous system | 35                                                    |
| Non-Hodgkin`s lymphoma       | 38                                 | Non-Hodgkin`s lymphoma                                |
| Leukemias                    | 39                                 | Leukemias                                             |
| Benign neoplasm              | 46                                 | Benign neoplasm of uterus                             |
|                              | 47                                 | Other and unspecified benign neoplasm                 |
| Thyroid disorders            | 48                                 | Thyroid disorders                                     |
| Diabetes mellitus            | 49                                 | Diabetes mellitus without complication                |
|                              | 50                                 | Diabetes mellitus with complications                  |
| Other endocrine disorders    | 51                                 | Other endocrine disorders                             |

|                                                             |     |                                                                                    |
|-------------------------------------------------------------|-----|------------------------------------------------------------------------------------|
|                                                             | 58  | Other nutritional; endocrine; and metabolic disorders                              |
| Nutritional deficiencies                                    | 52  | Nutritional deficiencies                                                           |
| Disorders of lipid metabolism                               | 53  | Disorders of lipid metabolism                                                      |
| Fluid and electrolyte disorders                             | 55  | Fluid and electrolyte disorders                                                    |
| Immunity disorders                                          | 57  | Immunity disorders                                                                 |
| Hematologic disorders                                       | 61  | Sickle cell anemia                                                                 |
|                                                             | 59  | Deficiency and other anemia                                                        |
|                                                             | 60  | Acute posthemorrhagic anemia                                                       |
|                                                             | 62  | Coagulation and hemorrhagic disorders                                              |
|                                                             | 63  | Diseases of white blood cells                                                      |
|                                                             | 64  | Other hematologic conditions                                                       |
| CNS infection                                               | 76  | Meningitis (except that caused by tuberculosis or sexually transmitted disease)    |
|                                                             | 77  | Encephalitis (except that caused by tuberculosis or sexually transmitted disease)  |
|                                                             | 78  | Other CNS infection and poliomyelitis                                              |
| Other hereditary and degenerative nervous system conditions | 81  | Other hereditary and degenerative nervous system conditions                        |
| Paralysis                                                   | 82  | Paralysis                                                                          |
| Epilepsy; convulsions                                       | 83  | Epilepsy; convulsions                                                              |
| Headache; including migraine                                | 84  | Headache; including migraine                                                       |
| Coma; stupor; and brain damage                              | 85  | Coma; stupor; and brain damage                                                     |
| Eye disorders                                               | 88  | Glaucoma                                                                           |
|                                                             | 86  | Cataract                                                                           |
|                                                             | 87  | Retinal detachments; defects; vascular occlusion; and retinopathy                  |
|                                                             | 89  | Blindness and vision defects                                                       |
|                                                             | 90  | Inflammation; infection of eye (except that caused by tuberculosis or sexually tr  |
|                                                             | 91  | Other eye disorders                                                                |
| Ear disorders                                               | 92  | Otitis media and related conditions                                                |
|                                                             | 93  | Conditions associated with dizziness or vertigo                                    |
|                                                             | 94  | Other ear and sense organ disorders                                                |
| Other nervous system disorders                              | 95  | Other nervous system disorders                                                     |
| Essential hypertension                                      | 98  | Essential hypertension                                                             |
|                                                             | 99  | Hypertension with complications and secondary hypertension                         |
| Heart diseases                                              | 103 | Pulmonary heart disease                                                            |
|                                                             | 104 | Other and ill-defined heart disease                                                |
|                                                             | 105 | Conduction disorders                                                               |
|                                                             | 106 | Cardiac dysrhythmias                                                               |
|                                                             | 107 | Cardiac arrest and ventricular fibrillation                                        |
|                                                             | 108 | Congestive heart failure; nonhypertensive                                          |
|                                                             | 96  | Heart valve disorders                                                              |
|                                                             | 97  | Peri-; endo-; and myocarditis; cardiomyopathy (except that caused by tuberculosis) |
| Cerebrovascular disease                                     | 109 | Acute cerebrovascular disease                                                      |
|                                                             | 111 | Other and ill-defined cerebrovascular disease                                      |
|                                                             | 113 | Late effects of cerebrovascular disease                                            |
|                                                             | 110 | Occlusion or stenosis of precerebral arteries                                      |
| Circulatory disease                                         | 119 | Varicose veins of lower extremity                                                  |
|                                                             | 120 | Hemorrhoids                                                                        |
|                                                             | 117 | Other circulatory disease                                                          |
|                                                             | 118 | Phlebitis; thrombophlebitis and thromboembolism                                    |
|                                                             | 121 | Other diseases of veins and lymphatics                                             |

|                                                          |                          |                                                                                                            |
|----------------------------------------------------------|--------------------------|------------------------------------------------------------------------------------------------------------|
| Lower respiratory disease                                | 122                      | Pneumonia (except that caused by tuberculosis or sexually transmitted disease)                             |
|                                                          | 133                      | Other lower respiratory disease                                                                            |
|                                                          | 125                      | Acute bronchitis                                                                                           |
| Upper respiratory disease                                | 126                      | Other upper respiratory infections                                                                         |
|                                                          | 134                      | Other upper respiratory disease                                                                            |
|                                                          | 124                      | Acute and chronic tonsillitis                                                                              |
| Chronic obstructive pulmonary disease and bronchiectasis | 127                      | Chronic obstructive pulmonary disease and bronchiectasis                                                   |
| Asthma                                                   | 128                      | Asthma                                                                                                     |
| Aspiration pneumonitis; food/vomitus                     | 129                      | Aspiration pneumonitis; food/vomitus                                                                       |
| Pleurisy; pneumothorax; pulmonary collapse               | 130                      | Pleurisy; pneumothorax; pulmonary collapse                                                                 |
| Respiratory failure; insufficiency; arrest (adult)       | 131                      | Respiratory failure; insufficiency; arrest (adult)                                                         |
| Mouth disorders                                          | 136                      | Disorders of teeth and jaw                                                                                 |
|                                                          | 137                      | Diseases of mouth; excluding dental                                                                        |
| Gastrointestinal disorders                               | 138                      | Esophageal disorders                                                                                       |
|                                                          | 140                      | Gastritis and duodenitis                                                                                   |
|                                                          | 141                      | Other disorders of stomach and duodenum                                                                    |
|                                                          | 142                      | Appendicitis and other appendiceal conditions                                                              |
|                                                          | 153                      | Gastrointestinal hemorrhage                                                                                |
|                                                          | 154                      | Noninfectious gastroenteritis                                                                              |
|                                                          | 155                      | Other gastrointestinal disorders                                                                           |
|                                                          | 135                      | Intestinal infection                                                                                       |
|                                                          | 143                      | Abdominal hernia                                                                                           |
|                                                          | 145                      | Intestinal obstruction without hernia                                                                      |
|                                                          | 147                      | Anal and rectal conditions                                                                                 |
|                                                          | 148                      | Peritonitis and intestinal abscess                                                                         |
|                                                          | 144                      | Regional enteritis and ulcerative colitis                                                                  |
|                                                          | Digestive system disease | 149                                                                                                        |
| 151                                                      |                          | Other liver diseases                                                                                       |
| 152                                                      |                          | Pancreatic disorders (not diabetes)                                                                        |
| Renal diseases                                           | 156                      | Nephritis; nephrosis; renal sclerosis                                                                      |
|                                                          | 157                      | Acute and unspecified renal failure                                                                        |
|                                                          | 158                      | Chronic kidney disease                                                                                     |
| Urinary tract disorders                                  | 159                      | Urinary tract infections                                                                                   |
|                                                          | 160                      | Calculus of urinary tract                                                                                  |
|                                                          | 161                      | Other diseases of kidney and ureters                                                                       |
|                                                          | 163                      | Genitourinary symptoms and ill-defined conditions                                                          |
| Genital disorders                                        | 165                      | Inflammatory conditions of male genital organs                                                             |
|                                                          | 166                      | Other male genital disorders                                                                               |
|                                                          | 168                      | Inflammatory diseases of female pelvic organs                                                              |
|                                                          | 171                      | Menstrual disorders                                                                                        |
|                                                          | 175                      | Other female genital disorders                                                                             |
| Skin disorders                                           | 197                      | Skin and subcutaneous tissue infections                                                                    |
|                                                          | 198                      | Other inflammatory condition of skin                                                                       |
|                                                          | 199                      | Chronic ulcer of skin                                                                                      |
|                                                          | 200                      | Other skin disorders                                                                                       |
| Arthritis                                                | 201                      | Infective arthritis and osteomyelitis (except that caused by tuberculosis or sexually transmitted disease) |
|                                                          | 202                      | Rheumatoid arthritis and related disease                                                                   |
|                                                          | 203                      | Osteoarthritis                                                                                             |
|                                                          | 204                      | Other non-traumatic joint disorders                                                                        |

|                                                                 |     |                                                                   |
|-----------------------------------------------------------------|-----|-------------------------------------------------------------------|
|                                                                 | 205 | Spondylosis; intervertebral disc disorders; other back problems   |
| Deformities                                                     | 208 | Acquired foot deformities                                         |
|                                                                 | 209 | Other acquired deformities                                        |
|                                                                 | 211 | Other connective tissue disease                                   |
|                                                                 | 212 | Other bone disease and musculoskeletal deformities                |
| Cardiac and circulatory congenital anomalies                    | 213 | Cardiac and circulatory congenital anomalies                      |
| Digestive congenital anomalies                                  | 214 | Digestive congenital anomalies                                    |
| Genitourinary congenital anomalies                              | 215 | Genitourinary congenital anomalies                                |
| Nervous system congenital anomalies                             | 216 | Nervous system congenital anomalies                               |
| Other congenital anomalies                                      | 217 | Other congenital anomalies                                        |
| Short gestation; low birth weight; and fetal growth retardation | 219 | Short gestation; low birth weight; and fetal growth retardation   |
| Perinatal trauma                                                | 220 | Intrauterine hypoxia and birth asphyxia                           |
|                                                                 | 221 | Respiratory distress syndrome                                     |
|                                                                 | 222 | Hemolytic jaundice and perinatal jaundice                         |
|                                                                 | 223 | Birth trauma                                                      |
|                                                                 | 224 | Other perinatal conditions                                        |
| Fractures and injuries                                          | 228 | Skull and face fractures                                          |
|                                                                 | 226 | Fracture of neck of femur (hip)                                   |
|                                                                 | 225 | Joint disorders and dislocations; trauma-related                  |
|                                                                 | 229 | Fracture of upper limb                                            |
|                                                                 | 230 | Fracture of lower limb                                            |
|                                                                 | 231 | Other fractures                                                   |
|                                                                 | 232 | Sprains and strains                                               |
|                                                                 | 233 | Intracranial injury                                               |
|                                                                 | 235 | Open wounds of head; neck; and trunk                              |
|                                                                 | 236 | Open wounds of extremities                                        |
|                                                                 | 239 | Superficial injury; contusion                                     |
|                                                                 | 244 | Other injuries and conditions due to external causes              |
|                                                                 | 240 | Burns                                                             |
| Mood and anxiety disorders                                      | 650 | Adjustment disorders                                              |
|                                                                 | 657 | Mood disorders                                                    |
|                                                                 | 658 | Personality disorders                                             |
|                                                                 | 651 | Anxiety disorders                                                 |
|                                                                 | 661 | Substance-related disorders                                       |
| Attention-deficit, conduct, and disruptive behavior disorders   | 652 | Attention-deficit, conduct, and disruptive behavior disorders     |
| Developmental disorders                                         | 654 | Developmental disorders                                           |
|                                                                 | 655 | Disorders usually diagnosed in infancy, childhood, or adolescence |
| Miscellaneous mental health disorders                           | 670 | Miscellaneous mental health disorders                             |
