# Supplementary material for: Comorbidity patterns and socioeconomic inequalities in children under 15 with medical complexity: a population-based study
Source: Springer Nature journal article supplement (doi:10.1186/s12887-020-02253-z), 2020-07-30
Supplement: MOESM3 [file 18233018]

### Additional file 3. Statistics for each Latent Class Model performed.

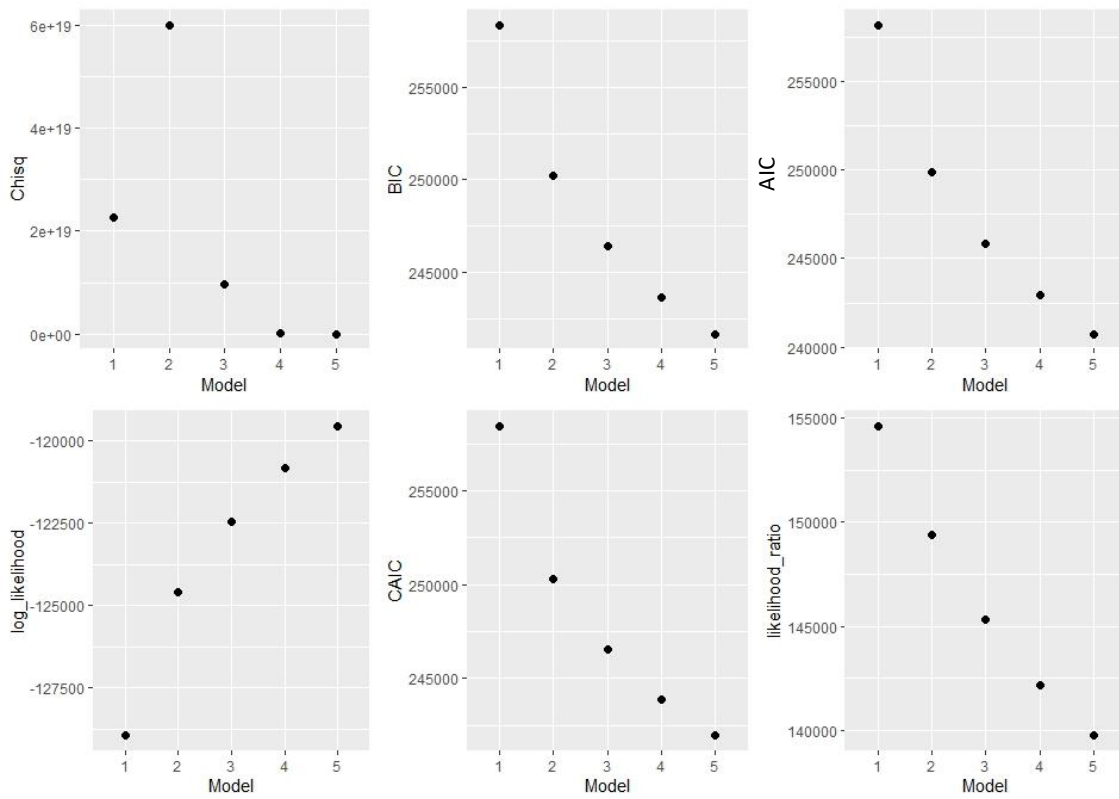

Chisq (Chi\_square goodness of fit), BIC (Bayesian Information Criterion), AIC (Akaike's Information Criterion), Log\_likelihood, CAIC (Consistent Akaike's Information Criterion), Likelihood\_ratio (Likelihood Ratio chi-square)
