# Supplementary material for: Comorbidity patterns and socioeconomic inequalities in children under 15 with medical complexity: a population-based study
Source: Springer Nature journal article supplement (doi:10.1186/s12887-020-02253-z), 2020-07-30
Supplement: MOESM4 [file 18233018]

**Additional file 3. Prevalences of all diseases categories by sex for each comorbidity class among the CMC in Catalonia, 2016.**

| Diseases (N (%))                                                | Oncology class |            | Neurodevelopment class |            | Congenital and perinatal class |            | Respiratory class |            |
|-----------------------------------------------------------------|----------------|------------|------------------------|------------|--------------------------------|------------|-------------------|------------|
|                                                                 | 2141 (36.0%)   |            | 818 (13.7%)            |            | 1177 (19.8%)                   |            | 1814 (30.5%)      |            |
|                                                                 | Boys           | Girls      | Boys                   | Girls      | Boys                           | Girls      | Boys              | Girls      |
| Septicemia                                                      | 107 (8.9)      | 74 (7.9)   | 49 (9.8)               | 31 (9.8)   | 207 (31.0)                     | 143 (28.1) | 38 (3.4)          | 20 (2.8)   |
| Hepatitis                                                       | 35 (2.9)       | 20 (2.1)   | 5 (1.0)                | 6 (1.9)    | 4 (0.6)                        | 3 (0.6)    | 8 (0.7)           | 3 (0.4)    |
| Cancer of brain and nervous system                              | 77 (6.4)       | 67 (7.1)   | 11 (2.2)               | 7 (2.2)    | 2 (0.3)                        | 3 (0.6)    | 0 (0.0)           | 0 (0.0)    |
| Non-Hodgkin`s lymphoma                                          | 53 (4.4)       | 15 (1.6)   | 0 (0.0)                | 0 (0.0)    | 0 (0.0)                        | 0 (0.0)    | 0 (0.0)           | 0 (0.0)    |
| Leukemias                                                       | 148 (12.3)     | 102 (10.8) | 0 (0.0)                | 0 (0.0)    | 8 (1.2)                        | 2 (0.4)    | 0 (0.0)           | 1 (0.1)    |
| Thyroid disorders                                               | 42 (3.5)       | 39 (4.1)   | 37 (7.4)               | 23 (7.3)   | 13 (1.9)                       | 10 (2.0)   | 8 (0.7)           | 3 (0.4)    |
| Nutritional deficiencies                                        | 67 (5.6)       | 70 (7.4)   | 76 (15.2)              | 58 (18.3)  | 65 (9.7)                       | 42 (8.3)   | 22 (2.0)          | 17 (2.4)   |
| Disorders of lipid metabolism                                   | 69 (5.8)       | 48 (5.1)   | 11 (2.2)               | 8 (2.5)    | 3 (0.4)                        | 1 (0.2)    | 15 (1.4)          | 12 (1.7)   |
| Fluid and electrolyte disorders                                 | 149 (12.4)     | 136 (14.5) | 121 (24.2)             | 76 (24.0)  | 173 (25.9)                     | 146 (28.7) | 149 (13.4)        | 90 (12.8)  |
| Immunity disorders                                              | 64 (5.3)       | 67 (7.1)   | 26 (5.2)               | 10 (3.2)   | 20 (3.0)                       | 10 (2.0)   | 27 (2.4)          | 22 (3.1)   |
| Other hereditary and degenerative nervous system conditions     | 78 (6.5)       | 56 (6.0)   | 120 (24.0)             | 67 (21.1)  | 22 (3.3)                       | 19 (3.7)   | 10 (0.9)          | 5 (0.7)    |
| Paralysis                                                       | 46 (3.8)       | 50 (5.3)   | 187 (37.3)             | 124 (39.1) | 4 (0.6)                        | 2 (0.4)    | 7 (0.6)           | 1 (0.1)    |
| Epilepsy; convulsions                                           | 114 (9.5)      | 82 (8.7)   | 286 (57.1)             | 196 (61.8) | 55 (8.2)                       | 39 (7.7)   | 75 (6.8)          | 51 (7.2)   |
| Headache; including migraine                                    | 194 (16.2)     | 198 (21.0) | 35 (7.0)               | 18 (5.7)   | 1 (0.1)                        | 0 (0.0)    | 21 (1.9)          | 17 (2.4)   |
| Coma; stupor; and brain damage                                  | 20 (1.7)       | 21 (2.2)   | 101 (20.2)             | 68 (21.5)  | 9 (1.3)                        | 15 (2.9)   | 17 (1.5)          | 4 (0.6)    |
| Other nervous system disorders                                  | 284 (23.7)     | 224 (23.8) | 326 (65.1)             | 202 (63.7) | 93 (13.9)                      | 75 (14.7)  | 102 (9.2)         | 58 (8.2)   |
| Chronic obstructive pulmonary disease and bronchiectasis        | 200 (16.7)     | 157 (16.7) | 165 (32.9)             | 99 (31.2)  | 151 (22.6)                     | 91 (17.9)  | 713 (64.2)        | 437 (62.1) |
| Asthma                                                          | 237 (19.8)     | 183 (19.4) | 140 (27.9)             | 81 (25.6)  | 97 (14.5)                      | 60 (11.8)  | 596 (53.7)        | 334 (47.4) |
| Aspiration pneumonitis; food/vomitus                            | 1 (0.1)        | 4 (0.4)    | 61 (12.2)              | 32 (10.1)  | 16 (2.4)                       | 17 (3.3)   | 13 (1.2)          | 3 (0.4)    |
| Pleurisy; pneumothorax; pulmonary collapse                      | 64 (5.3)       | 49 (5.2)   | 60 (12.0)              | 46 (14.5)  | 86 (12.9)                      | 76 (14.9)  | 98 (8.8)          | 102 (14.5) |
| Respiratory failure; insufficiency; arrest                      | 125 (10.4)     | 104 (11.1) | 211 (42.1)             | 139 (43.8) | 276 (41.3)                     | 219 (43.0) | 607 (54.7)        | 377 (53.6) |
| Cardiac and circulatory congenital anomalies                    | 137 (11.4)     | 104 (11.1) | 160 (31.9)             | 90 (28.4)  | 293 (43.9)                     | 220 (43.2) | 76 (6.8)          | 58 (8.2)   |
| Digestive congenital anomalies                                  | 47 (3.9)       | 35 (3.7)   | 51 (10.2)              | 23 (7.3)   | 110 (16.5)                     | 73 (14.3)  | 92 (8.3)          | 42 (6.0)   |
| Genitourinary congenital anomalies                              | 120 (10.0)     | 48 (5.1)   | 120 (24.0)             | 31 (9.8)   | 153 (22.9)                     | 76 (14.9)  | 128 (11.5)        | 75 (10.7)  |
| Nervous system congenital anomalies                             | 37 (3.1)       | 21 (2.2)   | 189 (37.7)             | 129 (40.7) | 98 (14.7)                      | 64 (12.6)  | 24 (2.2)          | 18 (2.6)   |
| Other congenital anomalies                                      | 184 (15.3)     | 140 (14.9) | 256 (51.1)             | 168 (53.0) | 246 (36.8)                     | 179 (35.2) | 238 (21.4)        | 151 (21.4) |
| Short gestation; low birth weight; and fetal growth retardation | 1 (0.1)        | 4 (0.4)    | 95 (19.0)              | 47 (14.8)  | 256 (38.3)                     | 202 (39.7) | 68 (6.1)          | 40 (5.7)   |
| Attention-deficit, conduct, and disruptive behavior disorders   | 230 (19.2)     | 122 (13.0) | 56 (11.2)              | 21 (6.6)   | 0 (0.0)                        | 0 (0.0)    | 23 (2.1)          | 8 (1.1)    |
| Miscellaneous mental health disorders                           | 84 (7.0)       | 89 (9.5)   | 30 (6.0)               | 24 (7.6)   | 15 (2.2)                       | 11 (2.2)   | 34 (3.1)          | 26 (3.7)   |
| Malignant cancer                                                | 284 (23.7)     | 232 (24.7) | 26 (5.2)               | 14 (4.4)   | 15 (2.2)                       | 21 (4.1)   | 19 (1.7)          | 10 (1.4)   |
| Diabetes mellitus                                               | 71 (5.9)       | 86 (9.1)   | 12 (2.4)               | 4 (1.3)    | 16 (2.4)                       | 24 (4.7)   | 27 (2.4)          | 21 (3.0)   |
| Benign neoplasm                                                 | 95 (7.9)       | 74 (7.9)   | 37 (7.4)               | 21 (6.6)   | 41 (6.1)                       | 71 (13.9)  | 69 (6.2)          | 50 (7.1)   |
| Essential hypertension                                          | 149 (12.4)     | 113 (12.0) | 35 (7.0)               | 17 (5.4)   | 27 (4.0)                       | 18 (3.5)   | 10 (0.9)          | 3 (0.4)    |
| Infections                                                      | 824 (68.7)     | 691 (73.4) | 377 (75.2)             | 253 (79.8) | 492 (73.7)                     | 390 (76.6) | 1015 (91.4)       | 660 (93.8) |

|                                  |            |            |            |            |            |            |             |            |
|----------------------------------|------------|------------|------------|------------|------------|------------|-------------|------------|
| Other endocrine disorders        | 434 (36.2) | 383 (40.7) | 231 (46.1) | 169 (53.3) | 198 (29.6) | 167 (32.8) | 277 (25.0)  | 168 (23.9) |
| Hematologic disorders            | 433 (36.1) | 329 (35.0) | 133 (26.5) | 88 (27.8)  | 237 (35.5) | 166 (32.6) | 202 (18.2)  | 116 (16.5) |
| Central nervous system infection | 23 (1.9)   | 18 (1.9)   | 45 (9.0)   | 24 (7.6)   | 30 (4.5)   | 24 (4.7)   | 23 (2.1)    | 13 (1.8)   |
| Eye disorders                    | 576 (48.0) | 462 (49.1) | 315 (62.9) | 198 (62.5) | 252 (37.7) | 210 (41.3) | 719 (64.8)  | 446 (63.4) |
| Ear disorders                    | 569 (47.4) | 504 (53.6) | 271 (54.1) | 163 (51.4) | 199 (29.8) | 148 (29.1) | 833 (75.0)  | 502 (71.3) |
| Heart diseases                   | 258 (21.5) | 190 (20.2) | 143 (28.5) | 92 (29.0)  | 281 (42.1) | 205 (40.3) | 171 (15.4)  | 105 (14.9) |
| Cerebrovascular disease          | 58 (4.8)   | 41 (4.4)   | 121 (24.2) | 67 (21.1)  | 38 (5.7)   | 24 (4.7)   | 17 (1.5)    | 6 (0.9)    |
| Circulatory disease              | 174 (14.5) | 127 (13.5) | 115 (23.0) | 74 (23.3)  | 113 (16.9) | 68 (13.4)  | 39 (3.5)    | 23 (3.3)   |
| Upper respiratory disease        | 974 (81.2) | 779 (82.8) | 442 (88.2) | 292 (92.1) | 567 (84.9) | 430 (84.5) | 1107 (99.7) | 703 (99.9) |
| Mouth disorders                  | 646 (53.8) | 503 (53.5) | 232 (46.3) | 134 (42.3) | 33 (4.9)   | 34 (6.7)   | 393 (35.4)  | 296 (42.0) |
| Gastrointestinal disorders       | 765 (63.8) | 606 (64.4) | 420 (83.8) | 259 (81.7) | 524 (78.4) | 375 (73.7) | 954 (85.9)  | 597 (84.8) |
| Digestive system disease         | 146 (12.2) | 112 (11.9) | 50 (10.0)  | 25 (7.9)   | 82 (12.3)  | 51 (10.0)  | 45 (4.1)    | 28 (4.0)   |
| Renal diseases                   | 115 (9.6)  | 105 (11.2) | 41 (8.2)   | 28 (8.8)   | 92 (13.8)  | 75 (14.7)  | 21 (1.9)    | 25 (3.6)   |
| Urinary tract disorders          | 320 (26.7) | 359 (38.2) | 157 (31.3) | 125 (39.4) | 192 (28.7) | 155 (30.5) | 185 (16.7)  | 221 (31.4) |
| Genital disorders                | 256 (21.3) | 166 (17.6) | 96 (19.2)  | 32 (10.1)  | 67 (10.0)  | 13 (2.6)   | 390 (35.1)  | 128 (18.2) |
| Skin disorders                   | 486 (40.5) | 409 (43.5) | 213 (42.5) | 125 (39.4) | 187 (28.0) | 161 (31.6) | 560 (50.5)  | 375 (53.3) |
| Arthritis                        | 333 (27.8) | 322 (34.2) | 67 (13.4)  | 50 (15.8)  | 32 (4.8)   | 20 (3.9)   | 108 (9.7)   | 55 (7.8)   |
| Deformities                      | 470 (39.2) | 404 (42.9) | 174 (34.7) | 101 (31.9) | 29 (4.3)   | 28 (5.5)   | 170 (15.3)  | 101 (14.3) |
| Perinatal trauma                 | 52 (4.3)   | 43 (4.6)   | 236 (47.1) | 148 (46.7) | 562 (84.1) | 380 (74.7) | 342 (30.8)  | 158 (22.4) |
| Fractures and injuries           | 802 (66.8) | 617 (65.6) | 302 (60.3) | 183 (57.7) | 198 (29.6) | 149 (29.3) | 758 (68.3)  | 468 (66.5) |
| Mood and anxiety disorders       | 243 (20.2) | 225 (23.9) | 22 (4.4)   | 27 (8.5)   | 71 (10.6)  | 46 (9.0)   | 31 (2.8)    | 11 (1.6)   |
| Developmental disorders          | 307 (25.6) | 165 (17.5) | 365 (72.9) | 225 (71.0) | 54 (8.1)   | 45 (8.8)   | 136 (12.3)  | 51 (7.2)   |
